# Supplementary material for: Economic co-production of poly(malic acid) and pullulan from Jerusalem artichoke tuber by Aureobasidium pullulans HA-4D
Source: BMC Biotechnol. 2017 Feb 23;17:20. doi: 10.1186/s12896-017-0340-y (PMC5324199; doi:10.1186/s12896-017-0340-y)
Supplement: Additional file 2: — Raw data used for the production of Additional file 1: Figure S1a, Table 2 and Table 4. (XLSX 186 kb) [file 12896_2017_340_MOESM2_ESM.xlsx]

## Sheet: FigS1a
FT-IR spectrum
Wave number (cm-1)	Transmittance(%)
400.157	97.4243
400.639	96.0506
401.121	95.125
401.603	94.3887
402.085	93.695
402.567	92.9938
403.05	92.2974
403.532	91.6428
404.014	91.0711
404.496	90.6263
404.978	90.3556
405.46	90.2922
405.942	90.4191
406.424	90.6359
406.906	90.764
407.389	90.6012
407.871	89.9982
408.353	88.9312
408.835	87.5526
409.317	86.1897
409.799	85.2581
410.281	85.0939
410.763	85.7976
411.245	87.1906
411.728	88.8891
412.21	90.4332
412.692	91.4153
413.174	91.5983
413.656	90.9965
414.138	89.8636
414.62	88.5683
415.103	87.4366
415.585	86.6661
416.067	86.344
416.549	86.5229
417.031	87.2976
417.513	88.8302
417.995	91.2349
418.477	94.2928
418.959	97.2755
419.442	99.3146
419.924	100
420.406	99.4814
420.888	98.1701
421.37	96.4921
421.852	94.7879
422.334	93.2817
422.816	92.0673
423.298	91.1112
423.781	90.2847
424.263	89.4299
424.745	88.4444
425.227	87.3429
425.709	86.2513
426.191	85.3341
426.673	84.7111
427.155	84.414
427.637	84.3933
428.12	84.5555
428.602	84.8072
429.084	85.0909
429.566	85.3988
430.048	85.7597
430.53	86.205
431.012	86.7348
431.494	87.3027
431.977	87.8277
432.459	88.225
432.941	88.4387
433.423	88.4605
433.905	88.3241
434.387	88.079
434.869	87.7639
435.351	87.3932
435.834	86.9656
436.316	86.4856
436.798	85.9831
437.28	85.5157
437.762	85.1473
438.244	84.9248
438.726	84.8641
439.208	84.9524
439.69	85.1558
440.173	85.4284
440.655	85.7192
441.137	85.9771
441.619	86.1574
442.101	86.2284
442.583	86.1763
443.065	86.0108
443.547	85.7656
444.029	85.4936
444.512	85.2527
444.994	85.085
445.476	84.9983
445.958	84.9577
446.44	84.8945
446.922	84.7314
447.404	84.4172
447.886	83.9559
448.368	83.4132
448.851	82.8929
449.333	82.4939
449.815	82.2749
450.297	82.239
450.779	82.3401
451.261	82.5015
451.743	82.6434
452.226	82.7149
452.708	82.7164
453.19	82.6969
453.672	82.7263
454.154	82.8623
454.636	83.1318
455.118	83.5271
455.6	84.0046
456.082	84.4853
456.565	84.8593
457.047	85.0074
457.529	84.8483
458.011	84.3838
458.493	83.7054
458.975	82.955
459.457	82.2691
459.939	81.7412
460.421	81.4071
460.904	81.2458
461.386	81.1891
461.868	81.1414
462.35	81.0072
462.832	80.7259
463.314	80.2982
463.796	79.7871
464.278	79.2943
464.76	78.918
465.243	78.7156
465.725	78.6874
466.207	78.7783
466.689	78.8994
467.171	78.9597
467.653	78.9037
468.135	78.7338
468.617	78.5046
469.099	78.2934
469.582	78.1657
470.064	78.1554
470.546	78.2589
471.028	78.4378
471.51	78.629
471.992	78.7636
472.474	78.7927
472.957	78.7077
473.439	78.5382
473.921	78.3301
474.403	78.1251
474.885	77.9481
475.367	77.8068
475.849	77.6947
476.331	77.5962
476.813	77.4924
477.296	77.3673
477.778	77.2138
478.26	77.0374
478.742	76.8554
479.224	76.691
479.706	76.5648
480.188	76.4875
480.67	76.4566
481.152	76.4598
481.635	76.4811
482.117	76.5086
482.599	76.5385
483.081	76.575
483.563	76.6239
484.045	76.6835
484.527	76.7394
485.009	76.7649
485.491	76.7299
485.974	76.6118
486.456	76.4052
486.938	76.1252
487.42	75.8043
487.902	75.4837
488.384	75.205
488.866	75.0026
489.348	74.9
489.831	74.9068
490.313	75.0159
490.795	75.2011
491.277	75.4188
491.759	75.6145
492.241	75.736
492.723	75.7479
493.205	75.6405
493.688	75.4301
494.17	75.151
494.652	74.8423
495.134	74.5369
495.616	74.2545
496.098	74.0045
496.58	73.7922
497.062	73.6278
497.544	73.5293
498.027	73.5187
498.509	73.611
498.991	73.8032
499.473	74.068
499.955	74.3557
500.437	74.6037
500.919	74.7522
501.401	74.7636
501.884	74.6384
502.366	74.4187
502.848	74.1696
503.33	73.9519
503.812	73.8012
504.294	73.7255
504.776	73.7159
505.258	73.7588
505.74	73.8436
506.223	73.9625
506.705	74.1055
507.187	74.255
507.669	74.3853
508.151	74.4678
508.633	74.4808
509.115	74.4164
509.597	74.2832
510.079	74.104
510.562	73.908
511.044	73.7225
511.526	73.5656
512.008	73.4453
512.49	73.3634
512.972	73.321
513.454	73.322
513.936	73.3726
514.418	73.4763
514.901	73.6285
515.383	73.8133
515.865	74.0053
516.347	74.1755
516.829	74.2994
517.311	74.3635
517.793	74.3665
518.275	74.3131
518.758	74.207
519.24	74.0462
519.722	73.8259
520.204	73.5461
520.686	73.2195
521.168	72.8734
521.65	72.5452
522.132	72.2716
522.615	72.0771
523.097	71.968
523.579	71.9321
524.061	71.9446
524.543	71.9758
525.025	71.9988
525.507	71.9957
525.989	71.9604
526.471	71.8972
526.954	71.8166
527.436	71.7321
527.918	71.6578
528.4	71.6094
528.882	71.6011
529.364	71.6435
529.846	71.7376
530.328	71.8724
530.811	72.0252
531.293	72.1688
531.775	72.2804
532.257	72.3507
532.739	72.3869
533.221	72.4098
533.703	72.4449
534.185	72.5122
534.667	72.6198
535.149	72.7615
535.632	72.9219
536.114	73.0837
536.596	73.233
537.078	73.3632
537.56	73.4732
538.042	73.5639
538.524	73.6352
539.006	73.6848
539.489	73.7104
539.971	73.7131
540.453	73.6998
540.935	73.683
541.417	73.6776
541.899	73.6954
542.381	73.7419
542.863	73.8143
543.346	73.9036
543.828	73.9974
544.31	74.0836
544.792	74.1522
545.274	74.1967
545.756	74.214
546.238	74.205
546.72	74.1733
547.202	74.1252
547.685	74.0677
548.167	74.0067
548.649	73.9445
549.131	73.878
549.613	73.7997
550.095	73.7003
550.577	73.5741
551.059	73.4232
551.542	73.2583
552.024	73.0965
552.506	72.955
552.988	72.8449
553.47	72.7668
553.952	72.7113
554.434	72.6633
554.916	72.6091
555.398	72.5413
555.881	72.4599
556.363	72.3698
556.845	72.275
557.327	72.1752
557.809	72.0649
558.291	71.9376
558.773	71.7914
559.255	71.6338
559.737	71.4815
560.22	71.3554
560.702	71.2724
561.184	71.2394
561.666	71.2502
562.148	71.2892
562.63	71.3385
563.112	71.3849
563.594	71.4236
564.077	71.4568
564.559	71.4897
565.041	71.5249
565.523	71.5591
566.005	71.5846
566.487	71.5929
566.969	71.5789
567.451	71.5429
567.933	71.4891
568.416	71.4214
568.898	71.3391
569.38	71.2365
569.862	71.1069
570.344	70.9481
570.826	70.7686
571.308	70.5879
571.79	70.4316
572.273	70.3221
572.755	70.2706
573.237	70.2722
573.719	70.3086
574.201	70.3543
574.683	70.3857
575.165	70.389
575.647	70.3637
576.13	70.321
576.612	70.2772
577.094	70.2461
577.576	70.2341
578.058	70.2408
578.54	70.2618
579.022	70.2932
579.504	70.3331
579.986	70.3816
580.468	70.4396
580.951	70.5071
581.433	70.5825
581.915	70.6633
582.397	70.7468
582.879	70.8306
583.361	70.911
583.843	70.9822
584.325	71.0362
584.808	71.0638
585.29	71.0589
585.772	71.0224
586.254	70.9654
586.736	70.9086
587.218	70.8855
587.7	70.9138
588.182	71.0062
588.664	71.1628
589.147	71.3713
589.629	71.6101
590.111	71.8524
590.593	72.0712
591.075	72.2427
591.557	72.3509
592.039	72.3899
592.521	72.3649
593.004	72.2893
593.486	72.1814
593.968	72.0599
594.45	71.9413
594.932	71.8372
595.414	71.7547
595.896	71.6964
596.378	71.6615
596.861	71.6471
597.343	71.6488
597.825	71.6604
598.307	71.6735
598.789	71.6768
599.271	71.6579
599.753	71.6073
600.235	71.5221
600.717	71.4098
601.199	71.2878
601.682	71.1784
602.164	71.1019
602.646	71.0697
603.128	71.0803
603.61	71.1204
604.092	71.1698
604.574	71.2096
605.057	71.228
605.539	71.2233
606.021	71.2016
606.503	71.1716
606.985	71.1384
607.467	71.101
607.949	71.0531
608.431	70.988
608.913	70.9024
609.395	70.8005
609.878	70.6924
610.36	70.591
610.842	70.5081
611.324	70.4517
611.806	70.4268
612.288	70.4369
612.77	70.4867
613.252	70.581
613.735	70.7221
614.217	70.9051
614.699	71.1149
615.181	71.3269
615.663	71.5124
616.145	71.647
616.627	71.7189
617.109	71.7334
617.591	71.7111
618.074	71.6801
618.556	71.6651
619.038	71.6798
619.52	71.7245
620.002	71.7903
620.484	71.8668
620.966	71.9481
621.448	72.0351
621.931	72.1334
622.413	72.2478
622.895	72.3778
623.377	72.5162
623.859	72.6514
624.341	72.7719
624.823	72.8709
625.305	72.9489
625.788	73.0122
626.27	73.0694
626.752	73.1274
627.234	73.1892
627.716	73.2547
628.198	73.3232
628.68	73.3958
629.162	73.4751
629.644	73.5642
630.126	73.6632
630.609	73.7689
631.091	73.8745
631.573	73.9732
632.055	74.0607
632.537	74.1373
633.019	74.2066
633.501	74.273
633.984	74.3382
634.466	74.3989
634.948	74.4485
635.43	74.4805
635.912	74.4933
636.394	74.4919
636.876	74.4869
637.358	74.4903
637.84	74.5103
638.322	74.5476
638.805	74.5958
639.287	74.6439
639.769	74.6815
640.251	74.7023
640.733	74.7057
641.215	74.6957
641.697	74.678
642.179	74.6574
642.662	74.6375
643.144	74.6213
643.626	74.6125
644.108	74.6159
644.59	74.635
645.072	74.6697
645.554	74.7138
646.036	74.7553
646.519	74.7806
647.001	74.7797
647.483	74.7505
647.965	74.7014
648.447	74.6481
648.929	74.6082
649.411	74.5937
649.893	74.607
650.375	74.6409
650.857	74.6824
651.34	74.719
651.822	74.7428
652.304	74.7523
652.786	74.7503
653.268	74.7411
653.75	74.728
654.232	74.7126
654.715	74.6969
655.197	74.6844
655.679	74.6802
656.161	74.689
656.643	74.7113
657.125	74.7414
657.607	74.7675
658.089	74.7758
658.571	74.7559
659.053	74.7049
659.536	74.6294
660.018	74.5415
660.5	74.4536
660.982	74.3739
661.464	74.3049
661.946	74.2471
662.428	74.2026
662.91	74.1783
663.393	74.1826
663.875	74.2195
664.357	74.2836
664.839	74.3598
665.321	74.4303
665.803	74.4831
666.285	74.5192
666.767	74.5486
667.25	74.576
667.732	74.5837
668.214	74.542
668.696	74.4569
669.178	74.3973
669.66	74.4325
670.142	74.5635
670.624	74.7397
671.106	74.9081
671.589	75.0403
672.071	75.133
672.553	75.1981
673.035	75.2488
673.517	75.2915
673.999	75.3231
674.481	75.3367
674.963	75.328
675.446	75.3019
675.928	75.2724
676.41	75.2574
676.892	75.2709
677.374	75.3163
677.856	75.3853
678.338	75.4614
678.82	75.5272
679.302	75.5701
679.784	75.5858
680.267	75.5769
680.749	75.5497
681.231	75.5104
681.713	75.463
682.195	75.4104
682.677	75.3556
683.159	75.3035
683.641	75.2596
684.124	75.2284
684.606	75.2106
685.088	75.2023
685.57	75.1972
686.052	75.1889
686.534	75.1741
687.016	75.1535
687.498	75.129
687.981	75.1009
688.463	75.0656
688.945	75.0158
689.427	74.9446
689.909	74.85
690.391	74.7387
690.873	74.6249
691.355	74.5268
691.837	74.4587
692.32	74.4253
692.802	74.4191
693.284	74.4241
693.766	74.4216
694.248	74.398
694.73	74.3491
695.212	74.2796
695.694	74.1988
696.177	74.1149
696.659	74.0311
697.141	73.9449
697.623	73.8511
698.105	73.7467
698.587	73.6337
699.069	73.5194
699.551	73.4129
700.033	73.3208
700.516	73.2447
700.998	73.1804
701.48	73.1207
701.962	73.0592
702.444	72.9928
702.926	72.9216
703.408	72.8473
703.89	72.7707
704.372	72.6908
704.855	72.6053
705.337	72.5131
705.819	72.4166
706.301	72.3223
706.783	72.2384
707.265	72.1716
707.747	72.1236
708.229	72.0904
708.712	72.0647
709.194	72.0404
709.676	72.0161
710.158	71.9965
710.64	71.9903
711.122	72.0055
711.604	72.0453
712.086	72.1059
712.568	72.1778
713.051	72.2508
713.533	72.3183
714.015	72.3806
714.497	72.4445
714.979	72.5204
715.461	72.6181
715.943	72.7434
716.425	72.8972
716.908	73.0765
717.39	73.2766
717.872	73.4914
718.354	73.7133
718.836	73.9326
719.318	74.1368
719.8	74.3135
720.282	74.4543
720.764	74.5594
721.247	74.6381
721.729	74.7063
722.211	74.7798
722.693	74.8687
723.175	74.974
723.657	75.0889
724.139	75.2028
724.621	75.3074
725.104	75.4007
725.586	75.4885
726.068	75.5808
726.55	75.6868
727.032	75.8092
727.514	75.942
727.996	76.0724
728.478	76.1858
728.96	76.271
729.443	76.3242
729.925	76.3491
730.407	76.354
730.889	76.3475
731.371	76.3354
731.853	76.3201
732.335	76.3022
732.817	76.2832
733.299	76.2666
733.782	76.2574
734.264	76.2598
734.746	76.2746
735.228	76.2983
735.71	76.3245
736.192	76.3474
736.674	76.3644
737.156	76.3778
737.639	76.3927
738.121	76.4142
738.603	76.4433
739.085	76.4763
739.567	76.5051
740.049	76.5214
740.531	76.52
741.013	76.5003
741.495	76.466
741.978	76.4214
742.46	76.3681
742.942	76.3035
743.424	76.2213
743.906	76.1151
744.388	75.9818
744.87	75.8236
745.352	75.6472
745.835	75.4608
746.317	75.271
746.799	75.0802
747.281	74.8875
747.763	74.6918
748.245	74.4943
748.727	74.3005
749.209	74.1185
749.692	73.9557
750.174	73.8156
750.656	73.6959
751.138	73.59
751.62	73.4906
752.102	73.3939
752.584	73.301
753.066	73.2168
753.548	73.1475
754.03	73.0962
754.513	73.0618
754.995	73.0397
755.477	73.0252
755.959	73.0164
756.441	73.0157
756.923	73.0288
757.405	73.061
757.888	73.1144
758.37	73.1869
758.852	73.2733
759.334	73.3689
759.816	73.4721
760.298	73.5879
760.78	73.7167
761.262	73.8599
761.744	74.0144
762.226	74.1724
762.709	74.3226
763.191	74.4544
763.673	74.5615
764.155	74.6439
764.637	74.707
765.119	74.7591
765.601	74.8069
766.083	74.8534
766.566	74.897
767.048	74.9342
767.53	74.9623
768.012	74.9819
768.494	74.9964
768.976	75.0102
769.458	75.0259
769.94	75.0421
770.423	75.0544
770.905	75.0576
771.387	75.0499
771.869	75.0349
772.351	75.0219
772.833	75.0234
773.315	75.0511
773.797	75.1124
774.279	75.209
774.761	75.3374
775.244	75.4919
775.726	75.6657
776.208	75.8524
776.69	76.0456
777.172	76.2381
777.654	76.4214
778.136	76.5875
778.619	76.7303
779.101	76.8481
779.583	76.9441
780.065	77.0257
780.547	77.1011
781.029	77.1765
781.511	77.2536
781.993	77.3295
782.475	77.3989
782.957	77.4574
783.44	77.5037
783.922	77.54
784.404	77.5708
784.886	77.5999
785.368	77.6282
785.85	77.6532
786.332	77.6708
786.814	77.6776
787.297	77.674
787.779	77.6643
788.261	77.6566
788.743	77.6593
789.225	77.6792
789.707	77.7202
790.189	77.783
790.671	77.8665
791.154	77.9686
791.636	78.0867
792.118	78.2165
792.6	78.3513
793.082	78.4832
793.564	78.6034
794.046	78.7058
794.528	78.7893
795.01	78.8581
795.493	78.9211
795.975	78.9879
796.457	79.0654
796.939	79.1552
797.421	79.2532
797.903	79.3527
798.385	79.4477
798.867	79.5363
799.35	79.6213
799.832	79.7086
800.314	79.8036
800.796	79.9086
801.278	80.0204
801.76	80.132
802.242	80.235
802.724	80.3234
803.206	80.3952
803.688	80.453
804.171	80.5024
804.653	80.5489
805.135	80.596
805.617	80.6443
806.099	80.6921
806.581	80.7364
807.063	80.7747
807.545	80.8059
808.028	80.8297
808.51	80.8474
808.992	80.8613
809.474	80.8749
809.956	80.8926
810.438	80.9194
810.92	80.9595
811.402	81.0141
811.885	81.0804
812.367	81.1518
812.849	81.2192
813.331	81.2743
813.813	81.312
814.295	81.332
814.777	81.3382
815.259	81.337
815.741	81.3346
816.224	81.3349
816.706	81.3393
817.188	81.3477
817.67	81.36
818.152	81.3772
818.634	81.4004
819.116	81.4298
819.598	81.4626
820.081	81.4932
820.563	81.5139
821.045	81.5181
821.527	81.5024
822.009	81.468
822.491	81.4198
822.973	81.3636
823.455	81.3034
823.937	81.2396
824.42	81.1697
824.902	81.0908
825.384	81.0024
825.866	80.9078
826.348	80.8132
826.83	80.7242
827.312	80.6427
827.794	80.565
828.277	80.4835
828.759	80.3905
829.241	80.2823
829.723	80.1629
830.205	80.0428
830.687	79.9348
831.169	79.8482
831.651	79.7847
832.133	79.7368
832.615	79.6902
833.098	79.6296
833.58	79.5432
834.062	79.4262
834.544	79.2809
835.026	79.1146
835.508	78.9363
835.99	78.755
836.472	78.5789
836.955	78.4166
837.437	78.2772
837.919	78.169
838.401	78.0969
838.883	78.0593
839.365	78.0475
839.847	78.0467
840.329	78.0411
840.812	78.0186
841.294	77.974
841.776	77.9105
842.258	77.8367
842.74	77.7619
843.222	77.6931
843.704	77.6327
844.186	77.5804
844.668	77.5351
845.151	77.4976
845.633	77.4704
846.115	77.4559
846.597	77.4534
847.079	77.4576
847.561	77.4594
848.043	77.4493
848.525	77.4221
849.008	77.3791
849.49	77.3286
849.972	77.2821
850.454	77.249
850.936	77.2329
851.418	77.2295
851.9	77.2301
852.382	77.2256
852.864	77.2114
853.347	77.1893
853.829	77.1668
854.311	77.1523
854.793	77.1516
855.275	77.1651
855.757	77.1883
856.239	77.2144
856.721	77.2377
857.203	77.256
857.686	77.2703
858.168	77.2827
858.65	77.2949
859.132	77.3062
859.614	77.3146
860.096	77.319
860.578	77.3206
861.06	77.3239
861.543	77.3353
862.025	77.36
862.507	77.4002
862.989	77.4537
863.471	77.5151
863.953	77.5792
864.435	77.6431
864.917	77.7079
865.399	77.7778
865.882	77.8579
866.364	77.9519
866.846	78.0602
867.328	78.1801
867.81	78.3075
868.292	78.4382
868.774	78.569
869.256	78.6981
869.739	78.8239
870.221	78.9444
870.703	79.058
871.185	79.1637
871.667	79.2629
872.149	79.3587
872.631	79.4561
873.113	79.5587
873.596	79.6668
874.078	79.7763
874.56	79.8798
875.042	79.9695
875.524	80.0408
876.006	80.095
876.488	80.1387
876.97	80.1819
877.452	80.233
877.934	80.296
878.417	80.3683
878.899	80.4424
879.381	80.5095
879.863	80.5629
880.345	80.6012
880.827	80.6272
881.309	80.6464
881.791	80.6642
882.274	80.683
882.756	80.7021
883.238	80.7186
883.72	80.7294
884.202	80.7321
884.684	80.7253
885.166	80.7076
885.648	80.6769
886.13	80.6296
886.613	80.5625
887.095	80.4739
887.577	80.3656
888.059	80.2428
888.541	80.1126
889.023	79.9814
889.505	79.8527
889.987	79.7263
890.47	79.5992
890.952	79.4686
891.434	79.3334
891.916	79.1956
892.398	79.0588
892.88	78.9262
893.362	78.7989
893.844	78.6749
894.326	78.5504
894.808	78.4229
895.291	78.2921
895.773	78.1615
896.255	78.0357
896.737	77.9192
897.219	77.8132
897.701	77.7158
898.183	77.623
898.665	77.5311
899.148	77.4394
899.63	77.3499
900.112	77.2666
900.594	77.1923
901.076	77.127
901.558	77.0668
902.04	77.0056
902.522	76.9374
903.005	76.8585
903.487	76.7682
903.969	76.6682
904.451	76.5603
904.933	76.4449
905.415	76.3201
905.897	76.1835
906.379	76.0336
906.861	75.8713
907.344	75.7006
907.826	75.5265
908.308	75.3531
908.79	75.1819
909.272	75.0117
909.754	74.8407
910.236	74.6683
910.718	74.4972
911.201	74.3328
911.683	74.1815
912.165	74.0475
912.647	73.9315
913.129	73.83
913.611	73.7374
914.093	73.6481
914.575	73.5591
915.057	73.4698
915.54	73.3807
916.022	73.2921
916.504	73.2026
916.986	73.1103
917.468	73.014
917.95	72.9155
918.432	72.8201
918.914	72.7352
919.396	72.6668
919.879	72.6169
920.361	72.5809
920.843	72.5496
921.325	72.5126
921.807	72.4621
922.289	72.3963
922.771	72.3194
923.253	72.2391
923.736	72.1631
924.218	72.0957
924.7	72.0368
925.182	71.983
925.664	71.9311
926.146	71.88
926.628	71.8323
927.11	71.793
927.592	71.7675
928.075	71.7589
928.557	71.7675
929.039	71.7913
929.521	71.8274
930.003	71.8739
930.485	71.9295
930.967	71.9938
931.449	72.0653
931.932	72.1415
932.414	72.2191
932.896	72.2958
933.378	72.3718
933.86	72.4503
934.342	72.5369
934.824	72.6376
935.306	72.7561
935.788	72.8924
936.271	73.0429
936.753	73.2026
937.235	73.3662
937.717	73.5305
938.199	73.6939
938.681	73.8561
939.163	74.0159
939.645	74.171
940.128	74.3181
940.61	74.4537
941.092	74.576
941.574	74.6854
942.056	74.784
942.538	74.8743
943.02	74.9581
943.502	75.0357
943.984	75.1067
944.467	75.171
944.949	75.2306
945.431	75.2894
945.913	75.3515
946.395	75.4191
946.877	75.4907
947.359	75.56
947.841	75.6182
948.323	75.6574
948.806	75.6736
949.288	75.6691
949.77	75.6514
950.252	75.6306
950.734	75.615
951.216	75.6086
951.698	75.6097
952.18	75.6128
952.663	75.6121
953.145	75.604
953.627	75.5887
954.109	75.5692
954.591	75.5488
955.073	75.5291
955.555	75.5083
956.037	75.4817
956.519	75.4439
957.002	75.3901
957.484	75.3178
957.966	75.2267
958.448	75.1175
958.93	74.9908
959.412	74.847
959.894	74.6867
960.376	74.5115
960.859	74.3246
961.341	74.1298
961.823	73.9306
962.305	73.7275
962.787	73.5179
963.269	73.2969
963.751	73.0594
964.233	72.8027
964.716	72.5281
965.198	72.2403
965.68	71.9453
966.162	71.6475
966.644	71.3473
967.126	71.0413
967.608	70.7241
968.09	70.3908
968.572	70.0393
969.054	69.6704
969.537	69.2866
970.019	68.8899
970.501	68.4803
970.983	68.0558
971.465	67.6145
971.947	67.1568
972.429	66.6861
972.911	66.2083
973.394	65.7293
973.876	65.2516
974.358	64.7727
974.84	64.2862
975.322	63.7846
975.804	63.2625
976.286	62.7192
976.768	62.1582
977.25	61.585
977.733	61.0034
978.215	60.4141
978.697	59.8147
979.179	59.2026
979.661	58.5775
980.143	57.9438
980.625	57.3095
981.107	56.683
981.59	56.0701
982.072	55.4718
982.554	54.8856
983.036	54.3081
983.518	53.7385
984	53.18
984.482	52.6384
984.964	52.1183
985.447	51.6207
985.929	51.1405
986.411	50.6699
986.893	50.2016
987.375	49.7336
987.857	49.2707
988.339	48.8225
988.821	48.3989
989.303	48.0056
989.785	47.6411
990.268	47.2984
990.75	46.9685
991.232	46.6451
991.714	46.3266
992.196	46.0155
992.678	45.7155
993.16	45.4277
993.643	45.1498
994.125	44.8771
994.607	44.6058
995.089	44.3363
995.571	44.0736
996.053	43.8255
996.535	43.5984
997.017	43.3939
997.499	43.2079
997.981	43.0332
998.464	42.8636
998.946	42.6972
999.428	42.5373
999.91	42.3892
1000.39	42.2561
1000.87	42.1357
1001.36	42.0193
1001.84	41.8954
1002.32	41.7549
1002.8	41.5954
1003.28	41.422
1003.77	41.2448
1004.25	41.0732
1004.73	40.9114
1005.21	40.7569
1005.7	40.6025
1006.18	40.4414
1006.66	40.2711
1007.14	40.095
1007.62	39.9201
1008.11	39.7527
1008.59	39.594
1009.07	39.44
1009.55	39.2837
1010.03	39.1198
1010.52	38.9491
1011	38.7786
1011.48	38.6185
1011.96	38.477
1012.45	38.3555
1012.93	38.2481
1013.41	38.1445
1013.89	38.0358
1014.37	37.9192
1014.86	37.7994
1015.34	37.6854
1015.82	37.586
1016.3	37.5043
1016.78	37.4368
1017.27	37.3761
1017.75	37.3161
1018.23	37.256
1018.71	37.2016
1019.2	37.1622
1019.68	37.1451
1020.16	37.1515
1020.64	37.175
1021.12	37.2053
1021.61	37.2331
1022.09	37.2553
1022.57	37.2757
1023.05	37.3026
1023.53	37.3432
1024.02	37.3998
1024.5	37.4678
1024.98	37.5393
1025.46	37.6076
1025.94	37.6709
1026.43	37.7335
1026.91	37.8021
1027.39	37.8814
1027.87	37.9698
1028.36	38.0593
1028.84	38.1398
1029.32	38.204
1029.8	38.2522
1030.28	38.2929
1030.77	38.3382
1031.25	38.398
1031.73	38.4743
1032.21	38.5602
1032.69	38.643
1033.18	38.7106
1033.66	38.7571
1034.14	38.785
1034.62	38.8029
1035.1	38.8203
1035.59	38.8426
1036.07	38.8688
1036.55	38.8937
1037.03	38.9118
1037.52	38.9218
1038	38.9279
1038.48	38.937
1038.96	38.9545
1039.44	38.9804
1039.93	39.0089
1040.41	39.0314
1040.89	39.0419
1041.37	39.0411
1041.85	39.0371
1042.34	39.0418
1042.82	39.065
1043.3	39.1098
1043.78	39.1709
1044.27	39.2382
1044.75	39.3022
1045.23	39.3588
1045.71	39.4113
1046.19	39.4672
1046.67	39.5334
1047.16	39.6116
1047.64	39.6974
1048.12	39.7828
1048.6	39.862
1049.09	39.9351
1049.57	40.0093
1050.05	40.0953
1050.53	40.2014
1051.01	40.3286
1051.5	40.4699
1051.98	40.6135
1052.46	40.7488
1052.94	40.872
1053.42	40.9875
1053.91	41.1052
1054.39	41.2349
1054.87	41.3814
1055.35	41.542
1055.84	41.7092
1056.32	41.876
1056.8	42.0403
1057.28	42.2066
1057.76	42.3833
1058.25	42.5777
1058.73	42.7912
1059.21	43.0177
1059.69	43.2467
1060.17	43.4683
1060.66	43.6779
1061.14	43.8785
1061.62	44.0778
1062.1	44.2834
1062.59	44.4984
1063.07	44.7189
1063.55	44.9362
1064.03	45.1412
1064.51	45.3287
1065	45.4993
1065.48	45.6569
1065.96	45.8049
1066.44	45.9414
1066.92	46.0587
1067.41	46.1451
1067.89	46.1897
1068.37	46.1874
1068.85	46.1402
1069.34	46.0561
1069.82	45.9444
1070.3	45.8111
1070.78	45.657
1071.26	45.4789
1071.74	45.2743
1072.23	45.0451
1072.71	44.7991
1073.19	44.5483
1073.67	44.3044
1074.16	44.0739
1074.64	43.8569
1075.12	43.6492
1075.6	43.4472
1076.08	43.2518
1076.57	43.0705
1077.05	42.9143
1077.53	42.7927
1078.01	42.7092
1078.49	42.6598
1078.98	42.6356
1079.46	42.6281
1079.94	42.634
1080.42	42.6568
1080.91	42.7045
1081.39	42.7845
1081.87	42.8988
1082.35	43.0425
1082.83	43.2067
1083.32	43.3829
1083.8	43.5682
1084.28	43.7656
1084.76	43.9823
1085.24	44.2241
1085.73	44.4909
1086.21	44.7757
1086.69	45.0671
1087.17	45.3541
1087.65	45.6313
1088.14	45.9
1088.62	46.166
1089.1	46.4349
1089.58	46.7078
1090.07	46.9793
1090.55	47.2396
1091.03	47.4795
1091.51	47.6939
1091.99	47.8847
1092.48	48.0579
1092.96	48.2205
1093.44	48.3751
1093.92	48.5187
1094.4	48.6439
1094.89	48.7432
1095.37	48.8129
1095.85	48.8553
1096.33	48.8772
1096.82	48.8863
1097.3	48.8875
1097.78	48.8811
1098.26	48.8638
1098.74	48.833
1099.23	48.7898
1099.71	48.7403
1100.19	48.694
1100.67	48.6593
1101.15	48.6397
1101.64	48.6326
1102.12	48.631
1102.6	48.628
1103.08	48.6209
1103.57	48.6131
1104.05	48.6125
1104.53	48.627
1105.01	48.6604
1105.49	48.7109
1105.98	48.7724
1106.46	48.8383
1106.94	48.9052
1107.42	48.9747
1107.9	49.0516
1108.39	49.14
1108.87	49.2403
1109.35	49.3475
1109.83	49.4535
1110.32	49.5512
1110.8	49.6384
1111.28	49.7186
1111.76	49.7999
1112.24	49.8901
1112.72	49.9931
1113.21	50.1068
1113.69	50.225
1114.17	50.341
1114.65	50.4512
1115.14	50.557
1115.62	50.6635
1116.1	50.7759
1116.58	50.8963
1117.06	51.022
1117.55	51.1466
1118.03	51.2641
1118.51	51.3712
1118.99	51.4693
1119.47	51.5625
1119.96	51.6554
1120.44	51.7496
1120.92	51.8432
1121.4	51.9328
1121.88	52.0162
1122.37	52.0956
1122.85	52.1771
1123.33	52.2686
1123.81	52.3755
1124.3	52.4972
1124.78	52.6268
1125.26	52.7534
1125.74	52.8674
1126.22	52.9642
1126.71	53.046
1127.19	53.1203
1127.67	53.1955
1128.15	53.2767
1128.63	53.364
1129.12	53.4531
1129.6	53.5382
1130.08	53.6157
1130.56	53.6849
1131.05	53.7473
1131.53	53.8033
1132.01	53.8493
1132.49	53.8779
1132.97	53.8799
1133.46	53.8483
1133.94	53.7817
1134.42	53.6855
1134.9	53.5693
1135.38	53.4421
1135.87	53.3085
1136.35	53.1663
1136.83	53.0089
1137.31	52.8295
1137.8	52.6253
1138.28	52.4008
1138.76	52.1655
1139.24	51.9299
1139.72	51.7014
1140.21	51.4808
1140.69	51.2636
1141.17	51.0435
1141.65	50.8167
1142.13	50.5847
1142.62	50.3535
1143.1	50.1304
1143.58	49.9202
1144.06	49.7233
1144.55	49.5361
1145.03	49.3543
1145.51	49.1764
1145.99	49.0049
1146.47	48.8453
1146.96	48.7021
1147.44	48.5763
1147.92	48.4639
1148.4	48.358
1148.88	48.2534
1149.37	48.1496
1149.85	48.0523
1150.33	47.971
1150.81	47.9147
1151.3	47.8871
1151.78	47.8853
1152.26	47.9016
1152.74	47.928
1153.22	47.9607
1153.7	48.0019
1154.19	48.0585
1154.67	48.1384
1155.15	48.2458
1155.63	48.3803
1156.12	48.537
1156.6	48.7109
1157.08	48.9004
1157.56	49.1082
1158.04	49.3407
1158.53	49.6036
1159.01	49.8995
1159.49	50.2261
1159.97	50.5782
1160.45	50.9511
1160.94	51.3435
1161.42	51.7592
1161.9	52.2045
1162.38	52.6854
1162.87	53.204
1163.35	53.7575
1163.83	54.3394
1164.31	54.9435
1164.79	55.5662
1165.28	56.2076
1165.76	56.8705
1166.24	57.5566
1166.72	58.2648
1167.2	58.9896
1167.69	59.7229
1168.17	60.4573
1168.65	61.1885
1169.13	61.9163
1169.62	62.6438
1170.1	63.3745
1170.58	64.1093
1171.06	64.8451
1171.54	65.575
1172.03	66.2908
1172.51	66.9849
1172.99	67.6524
1173.47	68.2912
1173.95	68.9009
1174.44	69.4819
1174.92	70.0338
1175.4	70.5556
1175.88	71.0464
1176.37	71.5068
1176.85	71.9394
1177.33	72.3478
1177.81	72.7355
1178.29	73.1039
1178.78	73.4519
1179.26	73.776
1179.74	74.0724
1180.22	74.3392
1180.7	74.5782
1181.19	74.7947
1181.67	74.9958
1182.15	75.1878
1182.63	75.3742
1183.11	75.5545
1183.6	75.7254
1184.08	75.8827
1184.56	76.0171
1185.04	76.1356
1185.53	76.2403
1186.01	76.3308
1186.49	76.4035
1186.97	76.4523
1187.45	76.4718
1187.94	76.46
1188.42	76.4205
1188.9	76.3617
1189.38	76.2936
1189.86	76.224
1190.35	76.1561
1190.83	76.0881
1191.31	76.0154
1191.79	75.9339
1192.28	75.842
1192.76	75.7416
1193.24	75.6357
1193.72	75.5264
1194.2	75.4131
1194.68	75.2933
1195.17	75.1642
1195.65	75.0261
1196.13	74.8826
1196.61	74.7407
1197.1	74.6069
1197.58	74.485
1198.06	74.3737
1198.54	74.2679
1199.02	74.1618
1199.51	74.0526
1199.99	73.9424
1200.47	73.8378
1200.95	73.7465
1201.43	73.674
1201.92	73.6208
1202.4	73.5826
1202.88	73.5537
1203.36	73.5295
1203.85	73.5095
1204.33	73.4967
1204.81	73.4957
1205.29	73.5092
1205.77	73.5366
1206.26	73.5742
1206.74	73.6179
1207.22	73.6659
1207.7	73.7203
1208.18	73.786
1208.67	73.8677
1209.15	73.9665
1209.63	74.0779
1210.11	74.1926
1210.6	74.3005
1211.08	74.3942
1211.56	74.4724
1212.04	74.5396
1212.52	74.6038
1213.01	74.6723
1213.49	74.7485
1213.97	74.8309
1214.45	74.9152
1214.93	74.9966
1215.42	75.0728
1215.9	75.1439
1216.38	75.2113
1216.86	75.2751
1217.35	75.3331
1217.83	75.3801
1218.31	75.4109
1218.79	75.4226
1219.27	75.4159
1219.76	75.3959
1220.24	75.3685
1220.72	75.3384
1221.2	75.3065
1221.68	75.2701
1222.17	75.2248
1222.65	75.1675
1223.13	75.0978
1223.61	75.018
1224.09	74.9317
1224.58	74.8408
1225.06	74.7449
1225.54	74.6414
1226.02	74.528
1226.51	74.4051
1226.99	74.277
1227.47	74.1509
1227.95	74.0336
1228.43	73.9286
1228.91	73.8345
1229.4	73.7459
1229.88	73.6573
1230.36	73.5658
1230.84	73.4732
1231.33	73.3855
1231.81	73.3086
1232.29	73.2457
1232.77	73.1946
1233.26	73.1492
1233.74	73.1025
1234.22	73.0507
1234.7	72.9959
1235.18	72.9447
1235.66	72.9051
1236.15	72.8817
1236.63	72.8735
1237.11	72.874
1237.59	72.8742
1238.08	72.8675
1238.56	72.853
1239.04	72.8355
1239.52	72.8231
1240	72.8236
1240.49	72.8401
1240.97	72.8709
1241.45	72.9108
1241.93	72.954
1242.41	72.9968
1242.9	73.0383
1243.38	73.0797
1243.86	73.1217
1244.34	73.1634
1244.83	73.2023
1245.31	73.2359
1245.79	73.2639
1246.27	73.2888
1246.75	73.3155
1247.24	73.3482
1247.72	73.3884
1248.2	73.4331
1248.68	73.4764
1249.16	73.5119
1249.65	73.5362
1250.13	73.5504
1250.61	73.5592
1251.09	73.568
1251.58	73.58
1252.06	73.5942
1252.54	73.6062
1253.02	73.6108
1253.5	73.6052
1253.98	73.5909
1254.47	73.5732
1254.95	73.5583
1255.43	73.5506
1255.91	73.5512
1256.4	73.5575
1256.88	73.5661
1257.36	73.5744
1257.84	73.5822
1258.33	73.59
1258.81	73.5968
1259.29	73.5985
1259.77	73.5878
1260.25	73.5572
1260.73	73.5034
1261.22	73.4303
1261.7	73.3494
1262.18	73.2763
1262.66	73.2248
1263.15	73.2021
1263.63	73.2063
1264.11	73.2276
1264.59	73.2542
1265.07	73.2767
1265.56	73.2924
1266.04	73.305
1266.52	73.3213
1267	73.3465
1267.48	73.3809
1267.97	73.4197
1268.45	73.4549
1268.93	73.4792
1269.41	73.4884
1269.89	73.4817
1270.38	73.46
1270.86	73.4239
1271.34	73.3722
1271.82	73.3038
1272.31	73.2196
1272.79	73.1254
1273.27	73.0313
1273.75	72.9495
1274.23	72.8895
1274.72	72.8541
1275.2	72.8385
1275.68	72.8324
1276.16	72.8254
1276.64	72.8121
1277.13	72.7938
1277.61	72.7773
1278.09	72.7707
1278.57	72.7775
1279.06	72.7948
1279.54	72.8141
1280.02	72.8255
1280.5	72.823
1280.98	72.8076
1281.47	72.7864
1281.95	72.7691
1282.43	72.7632
1282.91	72.7711
1283.39	72.7904
1283.88	72.8174
1284.36	72.8502
1284.84	72.8907
1285.32	72.9427
1285.81	73.0079
1286.29	73.082
1286.77	73.1539
1287.25	73.2082
1287.73	73.2313
1288.22	73.2176
1288.7	73.1723
1289.18	73.1091
1289.66	73.0438
1290.14	72.9876
1290.63	72.9429
1291.11	72.9045
1291.59	72.8644
1292.07	72.8184
1292.56	72.7695
1293.04	72.7269
1293.52	72.7008
1294	72.6964
1294.48	72.709
1294.96	72.7262
1295.45	72.7317
1295.93	72.7139
1296.41	72.6698
1296.89	72.6066
1297.38	72.537
1297.86	72.4726
1298.34	72.419
1298.82	72.374
1299.3	72.3317
1299.79	72.2871
1300.27	72.2406
1300.75	72.1982
1301.23	72.1676
1301.71	72.153
1302.2	72.1525
1302.68	72.1573
1303.16	72.1573
1303.64	72.1462
1304.13	72.1256
1304.61	72.1041
1305.09	72.0919
1305.57	72.0947
1306.05	72.109
1306.54	72.1231
1307.02	72.1229
1307.5	72.1003
1307.98	72.0593
1308.46	72.0162
1308.95	71.9938
1309.43	72.0116
1309.91	72.0769
1310.39	72.1815
1310.88	72.3041
1311.36	72.4173
1311.84	72.4967
1312.32	72.5278
1312.8	72.5095
1313.29	72.4528
1313.77	72.3751
1314.25	72.2944
1314.73	72.2247
1315.21	72.1751
1315.7	72.1501
1316.18	72.1484
1316.66	72.162
1317.14	72.1738
1317.62	72.1595
1318.11	72.0923
1318.59	71.9522
1319.07	71.7349
1319.55	71.4557
1320.04	71.1454
1320.52	70.8398
1321	70.5668
1321.48	70.3389
1321.96	70.1523
1322.45	69.9931
1322.93	69.846
1323.41	69.7018
1323.89	69.56
1324.38	69.4264
1324.86	69.3078
1325.34	69.206
1325.82	69.1164
1326.3	69.0301
1326.79	68.9393
1327.27	68.8416
1327.75	68.7408
1328.23	68.6441
1328.71	68.5566
1329.2	68.4774
1329.68	68.3991
1330.16	68.3122
1330.64	68.2113
1331.12	68.0998
1331.61	67.9903
1332.09	67.9003
1332.57	67.8451
1333.05	67.8322
1333.54	67.8614
1334.02	67.9287
1334.5	68.0327
1334.98	68.1792
1335.46	68.3809
1335.94	68.651
1336.43	68.9938
1336.91	69.3937
1337.39	69.8094
1337.87	70.1737
1338.36	70.4049
1338.84	70.4303
1339.32	70.2169
1339.8	69.793
1340.28	69.2405
1340.77	68.6608
1341.25	68.1361
1341.73	67.7117
1342.21	67.3991
1342.69	67.189
1343.18	67.0634
1343.66	67.0018
1344.14	66.9835
1344.62	66.9898
1345.11	67.0045
1345.59	67.0177
1346.07	67.0262
1346.55	67.0324
1347.03	67.0413
1347.52	67.0546
1348	67.0677
1348.48	67.0695
1348.96	67.0471
1349.44	66.9931
1349.93	66.9115
1350.41	66.8194
1350.89	66.7411
1351.37	66.6993
1351.86	66.7047
1352.34	66.7511
1352.82	66.8175
1353.3	66.8753
1353.78	66.8998
1354.27	66.879
1354.75	66.8173
1355.23	66.7325
1355.71	66.6463
1356.19	66.5762
1356.68	66.5311
1357.16	66.5146
1357.64	66.5308
1358.12	66.5894
1358.61	66.706
1359.09	66.8959
1359.57	67.1649
1360.05	67.4996
1360.53	67.8602
1361.02	68.18
1361.5	68.3756
1361.98	68.3729
1362.46	68.1456
1362.94	67.7402
[truncated: 5,470 more rows]

## Sheet: Table2
Table 2
Components	Concentration (g/L)	PMA (g/L)	Pullulan(g/L)	DCW(g/L)
NaNO3	0	28.3	4.9	12.8
		29.5	5.3	12.1
		28.9	5.8	12.7
	1	32.8	5.8	14.1
		33.7	6.8	13.3
		33.2	6.2	14.2
	2	30	5.2	15.5
		31.3	5.9	16.6
		32.1	6.2	15.4
KH2PO4	0	33.5	5.4	13.1
		34.5	6.7	13.2
		34.1	6.1	12.2
	0.1	33.5	5.7	13
		33.9	6.5	13.5
		32.9	6.8	15.2
	0.2	34.3	6.5	15.2
		32.2	6	14.6
		31.8	7.3	13.2
MgSO4	0	35.2	5.9	13.8
		35.5	5.2	13.3
		34.7	6.4	12.6
	0.1	35.3	6.2	12.1
		33.2	5.7	13.5
		33.9	6.5	13
	0.2	32.5	6.8	12.1
		33.8	7	13
		34.9	6.3	12.3
KCl	0	35.6	5.2	11.6
		36.3	6.1	11.9
		36.9	5.3	12.2
	0.5	35.8	5.9	12.5
		34.9	5.2	13.1
		34.5	6.1	12
	1	35.5	6.1	12.9
		33.3	6.9	11.8
		34.9	6.3	13.9
ZnSO4	0	36.4	6.4	13
		36.6	6	12.1
		37.4	5.7	12.5
	0.1	35.5	5.3	11.5
		37	6	12.5
		36.2	5.1	11.8
	0.2	36.4	5	11.2
		35.5	4.6	11.6
		35.4	5.7	12
CaCO3	0	25.8	10.4	11.1
		26.7	9	12.1
		26.6	9.6	11.3
	15	33.8	6.8	12.5
		34.7	7	11.4
		33.3	6.5	11.7
	30	36.9	6.4	11.4
		37.4	6.2	13.6
		35.6	5.5	12.2

## Sheet: Table4
Table 4
Time(h)	Medium	PYC(U/mg)	MDH(U/mg)	PGM(10-3 U/mg)	UDPG(10-3 U/mg)	FKS(U/mg)
40h	GM	0.22	5.16	7.36	55.56	0.72
		0.17	4.36	7.89	64.67	0.81
		0.15	4.13	8.33	50.45	0.84
	JAT	0.29	5.02	8.02	48.67	0.81
		0.34	5.75	8.26	53.21	0.86
		0.31	5.35	8.48	58.34	0.88
100h	GM	0.13	3.12	6.21	21.45	0.63
		0.1	2.35	5.89	25.43	0.68
		0.07	2.1	6.78	29.65	0.73
	JAT	0.22	2.6	5.34	28.23	0.64
		0.19	2.9	5.89	22.67	0.6
		0.15	3.15	6.36	32.67	0.72
